# Supplementary material
Source: MDPI journal article supplement (https://www.mdpi.com/1424-2818/16/4/224)
Supplement: s1 [file s1]

## Supplementary material

### Dissimilarity among Species and Higher Taxa of Amphibians in a Hotspot of Biodiversity and Endemism in the Neotropics

**Table S1.** Partitions of beta diversity of Amphibia between pairs of physiographic provinces of the state of Oaxaca.

| Total beta diversity ( $\beta_{sor}$ ) |       |       |       |       |       |       |       |       |       |       |       |       |
|----------------------------------------|-------|-------|-------|-------|-------|-------|-------|-------|-------|-------|-------|-------|
|                                        | DB    | MVO   | FT    | SMO   | PCG   | VCO   | MVC   | DIT   | SMC   | SMS   | PCP   | PCT   |
| <b>DB</b>                              | 0.000 |       |       |       |       |       |       |       |       |       |       |       |
| <b>MVO</b>                             | 0.700 | 0.000 |       |       |       |       |       |       |       |       |       |       |
| <b>FT</b>                              | 0.619 | 0.532 | 0.000 |       |       |       |       |       |       |       |       |       |
| <b>SMO</b>                             | 0.895 | 0.653 | 0.725 | 0.000 |       |       |       |       |       |       |       |       |
| <b>PCG</b>                             | 1.000 | 0.869 | 0.810 | 0.724 | 0.000 |       |       |       |       |       |       |       |
| <b>VCO</b>                             | 0.619 | 0.532 | 0.571 | 0.745 | 0.905 | 0.000 |       |       |       |       |       |       |
| <b>MVC</b>                             | 0.652 | 0.633 | 0.600 | 0.712 | 0.773 | 0.333 | 0.000 |       |       |       |       |       |
| <b>DIT</b>                             | 1.000 | 0.849 | 0.706 | 0.704 | 0.333 | 0.824 | 0.556 | 0.000 |       |       |       |       |
| <b>SMC</b>                             | 0.922 | 0.870 | 0.862 | 0.667 | 0.472 | 0.862 | 0.667 | 0.406 | 0.000 |       |       |       |
| <b>SMS</b>                             | 0.857 | 0.634 | 0.778 | 0.664 | 0.766 | 0.746 | 0.600 | 0.623 | 0.613 | 0.000 |       |       |
| <b>PCP</b>                             | 0.857 | 0.852 | 0.886 | 0.761 | 0.673 | 0.829 | 0.514 | 0.463 | 0.538 | 0.457 | 0.000 |       |
| <b>PCT</b>                             | 0.882 | 0.833 | 0.902 | 0.722 | 0.636 | 0.805 | 0.535 | 0.532 | 0.408 | 0.553 | 0.333 | 0.000 |

| Species replacement ( $\beta_{sim}$ ) |       |       |       |       |     |     |     |     |     |     |     |     |
|---------------------------------------|-------|-------|-------|-------|-----|-----|-----|-----|-----|-----|-----|-----|
|                                       | DB    | MVO   | FT    | SMO   | PCG | VCO | MVC | DIT | SMC | SMS | PCP | PCT |
| <b>DB</b>                             | 0.000 |       |       |       |     |     |     |     |     |     |     |     |
| <b>MVO</b>                            | 0.143 | 0.000 |       |       |     |     |     |     |     |     |     |     |
| <b>FT</b>                             | 0.429 | 0.214 | 0.000 |       |     |     |     |     |     |     |     |     |
| <b>SMO</b>                            | 0.286 | 0.364 | 0.000 | 0.000 |     |     |     |     |     |     |     |     |

|            |       |       |       |       |       |       |       |       |       |       |       |       |  |
|------------|-------|-------|-------|-------|-------|-------|-------|-------|-------|-------|-------|-------|--|
| <b>PCG</b> | 1.000 | 0.857 | 0.714 | 0.429 | 0.000 |       |       |       |       |       |       |       |  |
| <b>VCO</b> | 0.429 | 0.214 | 0.571 | 0.071 | 0.857 | 0.000 |       |       |       |       |       |       |  |
| <b>MVC</b> | 0.429 | 0.438 | 0.571 | 0.063 | 0.688 | 0.286 | 0.000 |       |       |       |       |       |  |
| <b>DIT</b> | 1.000 | 0.800 | 0.643 | 0.200 | 0.200 | 0.786 | 0.500 | 0.000 |       |       |       |       |  |
| <b>SMC</b> | 0.714 | 0.848 | 0.714 | 0.500 | 0.321 | 0.714 | 0.375 | 0.050 | 0.000 |       |       |       |  |
| <b>SMS</b> | 0.429 | 0.545 | 0.500 | 0.531 | 0.679 | 0.429 | 0.188 | 0.350 | 0.591 | 0.000 |       |       |  |
| <b>PCP</b> | 0.714 | 0.810 | 0.857 | 0.381 | 0.619 | 0.786 | 0.438 | 0.450 | 0.286 | 0.095 | 0.000 |       |  |
| <b>PCT</b> | 0.714 | 0.815 | 0.857 | 0.407 | 0.630 | 0.714 | 0.375 | 0.450 | 0.222 | 0.370 | 0.238 | 0.000 |  |

**Species richness differences ( $\beta_{sne}$ )**

|            | <b>DB</b> | <b>MVO</b> | <b>FT</b> | <b>SMO</b> | <b>PCG</b> | <b>VCO</b> | <b>MVC</b> | <b>DIT</b> | <b>SMC</b> | <b>SMS</b> | <b>PCP</b> | <b>PCT</b> |
|------------|-----------|------------|-----------|------------|------------|------------|------------|------------|------------|------------|------------|------------|
| <b>DB</b>  | 0.000     |            |           |            |            |            |            |            |            |            |            |            |
| <b>MVO</b> | 0.557     | 0.000      |           |            |            |            |            |            |            |            |            |            |
| <b>FT</b>  | 0.190     | 0.318      | 0.000     |            |            |            |            |            |            |            |            |            |
| <b>SMO</b> | 0.609     | 0.289      | 0.725     | 0.000      |            |            |            |            |            |            |            |            |
| <b>PCG</b> | 0.000     | 0.012      | 0.095     | 0.296      | 0.000      |            |            |            |            |            |            |            |
| <b>VCO</b> | 0.190     | 0.318      | 0.000     | 0.674      | 0.048      | 0.000      |            |            |            |            |            |            |
| <b>MVC</b> | 0.224     | 0.195      | 0.029     | 0.649      | 0.085      | 0.048      | 0.000      |            |            |            |            |            |
| <b>DIT</b> | 0.000     | 0.049      | 0.063     | 0.504      | 0.133      | 0.038      | 0.056      | 0.000      |            |            |            |            |
| <b>SMC</b> | 0.207     | 0.022      | 0.148     | 0.167      | 0.151      | 0.148      | 0.292      | 0.356      | 0.000      |            |            |            |
| <b>SMS</b> | 0.429     | 0.089      | 0.278     | 0.134      | 0.088      | 0.317      | 0.413      | 0.273      | 0.022      | 0.000      |            |            |
| <b>PCP</b> | 0.143     | 0.042      | 0.029     | 0.381      | 0.054      | 0.043      | 0.076      | 0.013      | 0.253      | 0.362      | 0.000      |            |
| <b>PCT</b> | 0.168     | 0.019      | 0.045     | 0.314      | 0.007      | 0.091      | 0.160      | 0.082      | 0.186      | 0.182      | 0.095      | 0.000      |

**Table S2.** Partitions of beta diversity of Anura between pairs of physiographic subprovinces of the state of Oaxaca.

| Total beta diversity ( $\beta_{sor}$ ) |       |       |       |       |       |       |       |       |       |       |       |       |
|----------------------------------------|-------|-------|-------|-------|-------|-------|-------|-------|-------|-------|-------|-------|
|                                        | DB    | MVO   | FT    | SMO   | PCG   | VCO   | MVC   | DIT   | SMC   | SMS   | PCP   | PCT   |
| <b>DB</b>                              | 0.000 |       |       |       |       |       |       |       |       |       |       |       |
| <b>MVO</b>                             | 0.613 | 0.000 |       |       |       |       |       |       |       |       |       |       |
| <b>FT</b>                              | 0.619 | 0.421 | 0.000 |       |       |       |       |       |       |       |       |       |
| <b>SMO</b>                             | 0.855 | 0.605 | 0.632 | 0.000 |       |       |       |       |       |       |       |       |
| <b>PCG</b>                             | 1.000 | 0.837 | 0.795 | 0.632 | 0.000 |       |       |       |       |       |       |       |
| <b>VCO</b>                             | 0.600 | 0.459 | 0.556 | 0.680 | 0.895 | 0.000 |       |       |       |       |       |       |
| <b>MVC</b>                             | 0.652 | 0.550 | 0.600 | 0.615 | 0.756 | 0.310 | 0.000 |       |       |       |       |       |
| <b>DIT</b>                             | 1.000 | 0.810 | 0.688 | 0.600 | 0.349 | 0.806 | 0.529 | 0.000 |       |       |       |       |
| <b>SMC</b>                             | 0.909 | 0.836 | 0.843 | 0.556 | 0.484 | 0.840 | 0.623 | 0.382 | 0.000 |       |       |       |
| <b>SMS</b>                             | 0.837 | 0.606 | 0.750 | 0.558 | 0.731 | 0.709 | 0.552 | 0.567 | 0.544 | 0.000 |       |       |
| <b>PCP</b>                             | 0.857 | 0.822 | 0.886 | 0.687 | 0.652 | 0.824 | 0.514 | 0.436 | 0.483 | 0.397 | 0.000 |       |
| <b>PCT</b>                             | 0.879 | 0.800 | 0.900 | 0.636 | 0.608 | 0.795 | 0.524 | 0.500 | 0.365 | 0.500 | 0.319 | 0.000 |

| Species replacement ( $\beta_{sim}$ ) |       |       |       |       |       |       |       |       |     |     |     |     |
|---------------------------------------|-------|-------|-------|-------|-------|-------|-------|-------|-----|-----|-----|-----|
|                                       | DB    | MVO   | FT    | SMO   | PCG   | VCO   | MVC   | DIT   | SMC | SMS | PCP | PCT |
| <b>DB</b>                             | 0.000 |       |       |       |       |       |       |       |     |     |     |     |
| <b>MVO</b>                            | 0.143 | 0.000 |       |       |       |       |       |       |     |     |     |     |
| <b>FT</b>                             | 0.429 | 0.214 | 0.000 |       |       |       |       |       |     |     |     |     |
| <b>SMO</b>                            | 0.286 | 0.292 | 0.000 | 0.000 |       |       |       |       |     |     |     |     |
| <b>PCG</b>                            | 1.000 | 0.833 | 0.714 | 0.360 | 0.000 |       |       |       |     |     |     |     |
| <b>VCO</b>                            | 0.429 | 0.231 | 0.538 | 0.077 | 0.846 | 0.000 |       |       |     |     |     |     |
| <b>MVC</b>                            | 0.429 | 0.438 | 0.571 | 0.063 | 0.688 | 0.231 | 0.000 |       |     |     |     |     |
| <b>DIT</b>                            | 1.000 | 0.778 | 0.643 | 0.111 | 0.222 | 0.769 | 0.500 | 0.000 |     |     |     |     |

|            |       |       |       |       |       |       |       |       |       |       |       |       |
|------------|-------|-------|-------|-------|-------|-------|-------|-------|-------|-------|-------|-------|
| <b>SMC</b> | 0.714 | 0.792 | 0.714 | 0.405 | 0.360 | 0.692 | 0.375 | 0.056 | 0.000 |       |       |       |
| <b>SMS</b> | 0.429 | 0.458 | 0.500 | 0.452 | 0.640 | 0.385 | 0.188 | 0.278 | 0.514 | 0.000 |       |       |
| <b>PCP</b> | 0.714 | 0.810 | 0.857 | 0.381 | 0.619 | 0.769 | 0.438 | 0.389 | 0.286 | 0.095 | 0.000 |       |
| <b>PCT</b> | 0.714 | 0.792 | 0.857 | 0.385 | 0.600 | 0.692 | 0.375 | 0.389 | 0.231 | 0.346 | 0.238 | 0.000 |

**Species richness differences (βsne)**

|            | <b>DB</b> | <b>MVO</b> | <b>FT</b> | <b>SMO</b> | <b>PCG</b> | <b>VCO</b> | <b>MVC</b> | <b>DIT</b> | <b>SMC</b> | <b>SMS</b> | <b>PCP</b> | <b>PCT</b> |
|------------|-----------|------------|-----------|------------|------------|------------|------------|------------|------------|------------|------------|------------|
| <b>DB</b>  | 0.000     |            |           |            |            |            |            |            |            |            |            |            |
| <b>MVO</b> | 0.470     | 0.000      |           |            |            |            |            |            |            |            |            |            |
| <b>FT</b>  | 0.190     | 0.207      | 0.000     |            |            |            |            |            |            |            |            |            |
| <b>SMO</b> | 0.569     | 0.313      | 0.632     | 0.000      |            |            |            |            |            |            |            |            |
| <b>PCG</b> | 0.000     | 0.003      | 0.081     | 0.272      | 0.000      |            |            |            |            |            |            |            |
| <b>VCO</b> | 0.171     | 0.229      | 0.017     | 0.603      | 0.049      | 0.000      |            |            |            |            |            |            |
| <b>MVC</b> | 0.224     | 0.113      | 0.029     | 0.553      | 0.069      | 0.080      | 0.000      |            |            |            |            |            |
| <b>DIT</b> | 0.000     | 0.032      | 0.045     | 0.489      | 0.127      | 0.037      | 0.029      | 0.000      |            |            |            |            |
| <b>SMC</b> | 0.195     | 0.044      | 0.129     | 0.150      | 0.124      | 0.148      | 0.248      | 0.326      | 0.000      |            |            |            |
| <b>SMS</b> | 0.408     | 0.148      | 0.250     | 0.105      | 0.091      | 0.324      | 0.364      | 0.289      | 0.031      | 0.000      |            |            |
| <b>PCP</b> | 0.143     | 0.013      | 0.029     | 0.306      | 0.033      | 0.054      | 0.076      | 0.047      | 0.197      | 0.302      | 0.000      |            |
| <b>PCT</b> | 0.165     | 0.008      | 0.043     | 0.252      | 0.008      | 0.103      | 0.149      | 0.111      | 0.134      | 0.154      | 0.081      | 0.000      |

**Table S3.** Partitions of beta diversity of Caudata between pairs of physiographic subprovinces of the state of Oaxaca.

| Total beta diversity ( $\beta_{sor}$ ) |       |       |       |       |       |       |       |
|----------------------------------------|-------|-------|-------|-------|-------|-------|-------|
|                                        | MVO   | SMO   | PCG   | VCO   | DIT   | SMC   | SMS   |
| MVO                                    | 0.000 |       |       |       |       |       |       |
| SMO                                    | 0.771 | 0.000 |       |       |       |       |       |
| PCG                                    | 1.000 | 1.000 | 0.000 |       |       |       |       |
| VCO                                    | 0.800 | 0.926 | 1.000 | 0.000 |       |       |       |
| DIT                                    | 1.000 | 1.000 | 0.200 | 1.000 | 0.000 |       |       |
| SMC                                    | 1.000 | 1.000 | 0.333 | 1.000 | 0.500 | 0.000 |       |
| SMS                                    | 0.733 | 1.000 | 1.000 | 1.000 | 1.000 | 1.000 | 0.000 |

| Species replacement ( $\beta_{sim}$ ) |       |       |       |       |       |       |       |
|---------------------------------------|-------|-------|-------|-------|-------|-------|-------|
|                                       | MVO   | SMO   | PCG   | VCO   | DIT   | SMC   | SMS   |
| MVO                                   | 0.000 |       |       |       |       |       |       |
| SMO                                   | 0.556 | 0.000 |       |       |       |       |       |
| PCG                                   | 1.000 | 1.000 | 0.000 |       |       |       |       |
| VCO                                   | 0.000 | 0.000 | 1.000 | 0.000 |       |       |       |
| DIT                                   | 1.000 | 1.000 | 0.000 | 1.000 | 0.000 |       |       |
| SMC                                   | 1.000 | 1.000 | 0.000 | 1.000 | 0.000 | 0.000 |       |
| SMS                                   | 0.667 | 1.000 | 1.000 | 1.000 | 1.000 | 1.000 | 0.000 |

| Species richness differences ( $\beta_{sne}$ ) |       |       |       |     |     |     |     |
|------------------------------------------------|-------|-------|-------|-----|-----|-----|-----|
|                                                | MVO   | SMO   | PCG   | VCO | DIT | SMC | SMS |
| MVO                                            | 0.000 |       |       |     |     |     |     |
| SMO                                            | 0.216 | 0.000 |       |     |     |     |     |
| PCG                                            | 0.000 | 0.000 | 0.000 |     |     |     |     |



|            |       |       |       |       |       |       |       |       |       |       |       |       |  |
|------------|-------|-------|-------|-------|-------|-------|-------|-------|-------|-------|-------|-------|--|
| <b>FT</b>  | 0.148 | 0.118 | 0.000 |       |       |       |       |       |       |       |       |       |  |
| <b>SMO</b> | 0.074 | 0.185 | 0.000 | 0.000 |       |       |       |       |       |       |       |       |  |
| <b>PCG</b> | 0.444 | 0.615 | 0.441 | 0.261 | 0.000 |       |       |       |       |       |       |       |  |
| <b>VCO</b> | 0.370 | 0.108 | 0.441 | 0.027 | 0.486 | 0.000 |       |       |       |       |       |       |  |
| <b>MVC</b> | 0.333 | 0.325 | 0.441 | 0.025 | 0.400 | 0.270 | 0.000 |       |       |       |       |       |  |
| <b>DIT</b> | 0.519 | 0.593 | 0.500 | 0.130 | 0.093 | 0.459 | 0.325 | 0.000 |       |       |       |       |  |
| <b>SMC</b> | 0.370 | 0.615 | 0.471 | 0.344 | 0.203 | 0.405 | 0.175 | 0.037 | 0.000 |       |       |       |  |
| <b>SMS</b> | 0.259 | 0.369 | 0.324 | 0.327 | 0.319 | 0.270 | 0.100 | 0.130 | 0.344 | 0.000 |       |       |  |
| <b>PCP</b> | 0.370 | 0.621 | 0.500 | 0.224 | 0.310 | 0.541 | 0.250 | 0.241 | 0.190 | 0.069 | 0.000 |       |  |
| <b>PCT</b> | 0.370 | 0.646 | 0.500 | 0.273 | 0.394 | 0.514 | 0.225 | 0.333 | 0.167 | 0.227 | 0.172 | 0.000 |  |

**Taxonomic richness differences (βsne)**

|            | <b>DB</b> | <b>MVO</b> | <b>FT</b> | <b>SMO</b> | <b>PCG</b> | <b>VCO</b> | <b>MVC</b> | <b>DIT</b> | <b>SMC</b> | <b>SMS</b> | <b>PCP</b> | <b>PCT</b> |
|------------|-----------|------------|-----------|------------|------------|------------|------------|------------|------------|------------|------------|------------|
| <b>DB</b>  | 0.000     |            |           |            |            |            |            |            |            |            |            |            |
| <b>MVO</b> | 0.367     | 0.000      |           |            |            |            |            |            |            |            |            |            |
| <b>FT</b>  | 0.098     | 0.276      | 0.000     |            |            |            |            |            |            |            |            |            |
| <b>SMO</b> | 0.628     | 0.301      | 0.611     | 0.000      |            |            |            |            |            |            |            |            |
| <b>PCG</b> | 0.243     | 0.011      | 0.190     | 0.253      | 0.000      |            |            |            |            |            |            |            |
| <b>VCO</b> | 0.098     | 0.245      | 0.024     | 0.568      | 0.155      | 0.000      |            |            |            |            |            |            |
| <b>MVC</b> | 0.129     | 0.161      | 0.045     | 0.544      | 0.160      | 0.028      | 0.000      |            |            |            |            |            |
| <b>DIT</b> | 0.160     | 0.038      | 0.114     | 0.388      | 0.111      | 0.101      | 0.101      | 0.000      |            |            |            |            |
| <b>SMC</b> | 0.339     | 0.062      | 0.239     | 0.145      | 0.105      | 0.248      | 0.317      | 0.241      | 0.000      |            |            |            |
| <b>SMS</b> | 0.421     | 0.128      | 0.328     | 0.121      | 0.118      | 0.330      | 0.378      | 0.252      | 0.028      | 0.000      |            |            |
| <b>PCP</b> | 0.230     | 0.022      | 0.130     | 0.324      | 0.060      | 0.102      | 0.138      | 0.027      | 0.175      | 0.239      | 0.000      |            |
| <b>PCT</b> | 0.264     | 0.003      | 0.160     | 0.264      | 0.013      | 0.137      | 0.190      | 0.067      | 0.128      | 0.151      | 0.053      | 0.000      |

**Table S5.** Partitions of taxonomic beta diversity of Anura between pairs of physiographic provinces of the state of Oaxaca.

| Total taxonomic beta diversity ( $\beta_{sor}$ ) |       |       |       |       |       |       |       |       |       |       |       |       |
|--------------------------------------------------|-------|-------|-------|-------|-------|-------|-------|-------|-------|-------|-------|-------|
|                                                  | DB    | MVO   | FT    | SMO   | PCG   | VCO   | MVC   | DIT   | SMC   | SMS   | PCP   | PCT   |
| <b>DB</b>                                        | 0.000 |       |       |       |       |       |       |       |       |       |       |       |
| <b>MVO</b>                                       | 0.385 | 0.000 |       |       |       |       |       |       |       |       |       |       |
| <b>FT</b>                                        | 0.279 | 0.294 | 0.000 |       |       |       |       |       |       |       |       |       |
| <b>SMO</b>                                       | 0.632 | 0.450 | 0.524 | 0.000 |       |       |       |       |       |       |       |       |
| <b>PCG</b>                                       | 0.667 | 0.596 | 0.608 | 0.442 | 0.000 |       |       |       |       |       |       |       |
| <b>VCO</b>                                       | 0.400 | 0.286 | 0.433 | 0.549 | 0.646 | 0.000 |       |       |       |       |       |       |
| <b>MVC</b>                                       | 0.463 | 0.407 | 0.486 | 0.490 | 0.553 | 0.260 | 0.000 |       |       |       |       |       |
| <b>DIT</b>                                       | 0.658 | 0.600 | 0.590 | 0.456 | 0.232 | 0.561 | 0.393 | 0.000 |       |       |       |       |
| <b>SMC</b>                                       | 0.670 | 0.638 | 0.673 | 0.405 | 0.309 | 0.633 | 0.431 | 0.248 | 0.000 |       |       |       |
| <b>SMS</b>                                       | 0.636 | 0.478 | 0.607 | 0.375 | 0.411 | 0.569 | 0.415 | 0.333 | 0.333 | 0.000 |       |       |
| <b>PCP</b>                                       | 0.600 | 0.596 | 0.630 | 0.473 | 0.355 | 0.626 | 0.388 | 0.234 | 0.299 | 0.234 | 0.000 |       |
| <b>PCT</b>                                       | 0.640 | 0.593 | 0.646 | 0.450 | 0.376 | 0.621 | 0.392 | 0.351 | 0.261 | 0.338 | 0.200 | 0.000 |
| Taxonomic replacement ( $\beta_{sim}$ )          |       |       |       |       |       |       |       |       |       |       |       |       |
|                                                  | DB    | MVO   | FT    | SMO   | PCG   | VCO   | MVC   | DIT   | SMC   | SMS   | PCP   | PCT   |
| <b>DB</b>                                        | 0.000 |       |       |       |       |       |       |       |       |       |       |       |
| <b>MVO</b>                                       | 0.111 | 0.000 |       |       |       |       |       |       |       |       |       |       |
| <b>FT</b>                                        | 0.185 | 0.118 | 0.000 |       |       |       |       |       |       |       |       |       |
| <b>SMO</b>                                       | 0.074 | 0.137 | 0.000 | 0.000 |       |       |       |       |       |       |       |       |
| <b>PCG</b>                                       | 0.444 | 0.549 | 0.441 | 0.238 | 0.000 |       |       |       |       |       |       |       |
| <b>VCO</b>                                       | 0.333 | 0.091 | 0.424 | 0.030 | 0.485 | 0.000 |       |       |       |       |       |       |
| <b>MVC</b>                                       | 0.333 | 0.325 | 0.441 | 0.050 | 0.425 | 0.182 | 0.000 |       |       |       |       |       |



|            |       |       |       |       |       |       |       |       |       |       |       |       |
|------------|-------|-------|-------|-------|-------|-------|-------|-------|-------|-------|-------|-------|
| <b>DIT</b> | 0.519 | 0.592 | 0.500 | 0.122 | 0.122 | 0.455 | 0.325 | 0.000 |       |       |       |       |
| <b>SMC</b> | 0.370 | 0.549 | 0.471 | 0.276 | 0.238 | 0.394 | 0.175 | 0.041 | 0.000 |       |       |       |
| <b>SMS</b> | 0.259 | 0.314 | 0.324 | 0.277 | 0.317 | 0.242 | 0.100 | 0.102 | 0.303 | 0.000 |       |       |
| <b>PCP</b> | 0.370 | 0.569 | 0.500 | 0.241 | 0.328 | 0.485 | 0.250 | 0.163 | 0.190 | 0.069 | 0.000 |       |
| <b>PCT</b> | 0.407 | 0.549 | 0.500 | 0.242 | 0.371 | 0.455 | 0.225 | 0.265 | 0.177 | 0.226 | 0.172 | 0.000 |

**Taxonomic richness differences ( $\beta_{sne}$ )**

|            | <b>DB</b> | <b>MVO</b> | <b>FT</b> | <b>SMO</b> | <b>PCG</b> | <b>VCO</b> | <b>MVC</b> | <b>DIT</b> | <b>SMC</b> | <b>SMS</b> | <b>PCP</b> | <b>PCT</b> |
|------------|-----------|------------|-----------|------------|------------|------------|------------|------------|------------|------------|------------|------------|
| <b>DB</b>  | 0.000     |            |           |            |            |            |            |            |            |            |            |            |
| <b>MVO</b> | 0.274     | 0.000      |           |            |            |            |            |            |            |            |            |            |
| <b>FT</b>  | 0.094     | 0.176      | 0.000     |            |            |            |            |            |            |            |            |            |
| <b>SMO</b> | 0.558     | 0.313      | 0.524     | 0.000      |            |            |            |            |            |            |            |            |
| <b>PCG</b> | 0.222     | 0.047      | 0.167     | 0.204      | 0.000      |            |            |            |            |            |            |            |
| <b>VCO</b> | 0.067     | 0.195      | 0.009     | 0.519      | 0.161      | 0.000      |            |            |            |            |            |            |
| <b>MVC</b> | 0.129     | 0.082      | 0.045     | 0.440      | 0.128      | 0.078      | 0.000      |            |            |            |            |            |
| <b>DIT</b> | 0.139     | 0.008      | 0.090     | 0.333      | 0.110      | 0.106      | 0.068      | 0.000      |            |            |            |            |
| <b>SMC</b> | 0.300     | 0.089      | 0.202     | 0.129      | 0.071      | 0.239      | 0.256      | 0.207      | 0.000      |            |            |            |
| <b>SMS</b> | 0.377     | 0.164      | 0.283     | 0.098      | 0.093      | 0.327      | 0.315      | 0.231      | 0.031      | 0.000      |            |            |
| <b>PCP</b> | 0.230     | 0.028      | 0.130     | 0.232      | 0.028      | 0.142      | 0.138      | 0.070      | 0.109      | 0.165      | 0.000      |            |
| <b>PCT</b> | 0.233     | 0.044      | 0.146     | 0.208      | 0.005      | 0.167      | 0.167      | 0.086      | 0.083      | 0.112      | 0.028      | 0.000      |

**Table S6.** Partitions of taxonomic beta diversity of Caudata between pairs of physiographic subprovinces of the state of Oaxaca.

**Total taxonomic beta diversity ( $\beta_{sor}$ )**

|            | <b>MVO</b> | <b>SMO</b> | <b>PCG</b> | <b>VCO</b> | <b>DIT</b> | <b>SMC</b> | <b>SMS</b> |
|------------|------------|------------|------------|------------|------------|------------|------------|
| <b>MVO</b> | 0.000      |            |            |            |            |            |            |

|            |       |       |       |       |       |       |       |
|------------|-------|-------|-------|-------|-------|-------|-------|
| <b>SMO</b> | 0.583 | 0.000 |       |       |       |       |       |
| <b>PCG</b> | 0.727 | 0.800 | 0.000 |       |       |       |       |
| <b>VCO</b> | 0.600 | 0.737 | 0.500 | 0.000 |       |       |       |
| <b>DIT</b> | 0.714 | 0.795 | 0.077 | 0.455 | 0.000 |       |       |
| <b>SMC</b> | 0.840 | 0.860 | 0.294 | 0.733 | 0.375 | 0.000 |       |
| <b>SMS</b> | 0.481 | 0.733 | 0.579 | 0.647 | 0.556 | 0.727 | 0.000 |

**Taxonomic replacement ( $\beta_{sim}$ )**

|            | <b>MVO</b> | <b>SMO</b> | <b>PCG</b> | <b>VCO</b> | <b>DIT</b> | <b>SMC</b> | <b>SMS</b> |
|------------|------------|------------|------------|------------|------------|------------|------------|
| <b>MVO</b> | 0.000      |            |            |            |            |            |            |
| <b>SMO</b> | 0.333      | 0.000      |            |            |            |            |            |
| <b>PCG</b> | 0.571      | 0.429      | 0.000      |            |            |            |            |
| <b>VCO</b> | 0.200      | 0.000      | 0.400      | 0.000      |            |            |            |
| <b>DIT</b> | 0.500      | 0.333      | 0.000      | 0.400      | 0.000      |            |            |
| <b>SMC</b> | 0.800      | 0.700      | 0.143      | 0.600      | 0.167      | 0.000      |            |
| <b>SMS</b> | 0.417      | 0.500      | 0.429      | 0.400      | 0.333      | 0.700      | 0.000      |

**Taxonomic richness differences ( $\beta_{sne}$ )**

|            | <b>MVO</b> | <b>SMO</b> | <b>PCG</b> | <b>VCO</b> | <b>DIT</b> | <b>SMC</b> | <b>SMS</b> |
|------------|------------|------------|------------|------------|------------|------------|------------|
| <b>MVO</b> | 0.000      |            |            |            |            |            |            |
| <b>SMO</b> | 0.250      | 0.000      |            |            |            |            |            |
| <b>PCG</b> | 0.156      | 0.371      | 0.000      |            |            |            |            |
| <b>VCO</b> | 0.400      | 0.737      | 0.100      | 0.000      |            |            |            |
| <b>DIT</b> | 0.214      | 0.462      | 0.077      | 0.055      | 0.000      |            |            |
| <b>SMC</b> | 0.040      | 0.160      | 0.151      | 0.133      | 0.208      | 0.000      |            |
| <b>SMS</b> | 0.065      | 0.233      | 0.150      | 0.247      | 0.222      | 0.027      | 0.000      |
